# Supplementary material for: Effectiveness of a Simultaneous rHVT-F(ND) and rHVT-H5(AI) Vaccination of Day-Old Chickens and the Influence of NDV- and AIV-Specific MDA on Immune Response and Conferred Protection
Source: MDPI journal article supplement (doi:10.3390/vaccines8030536), 2020-09-16
Supplement: s1 [file s1]

- 1 **Supplementary Materials:** The following are available online at [www.mdpi.com/xxx/sx](http://www.mdpi.com/xxx/sx) :
- 2 Figure S1: Title “NDV-specific IgG antibody responses measured in in-house ELISAs-IgG for WL SPF chickens
- 3 (a) and LBL layer chickens (b) vaccinated at day-old (experiments I and II, respectively) with rHVT-F(ND) or
- 4 both rHVT-H5(AI)/rHVT-F(ND) vaccines”
- 5 Figure S2, Title “AIV-specific IgG antibody responses measured in in-house ELISAs-IgG for WL SPF chickens
- 6 (a) and LBL layer chickens (b) vaccinated at day-old (experiments I and II, respectively) with rHVT-H5(AI) or
- 7 both rHVT-H5(AI)/rHVT-F(ND) vaccines”
- 8

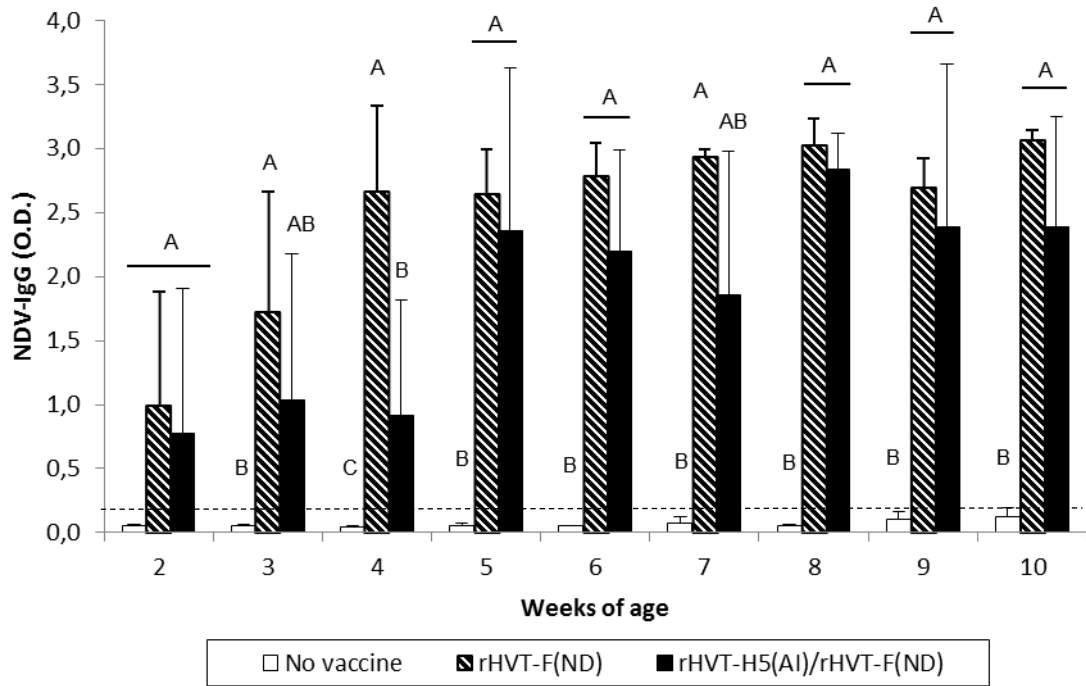

(a)

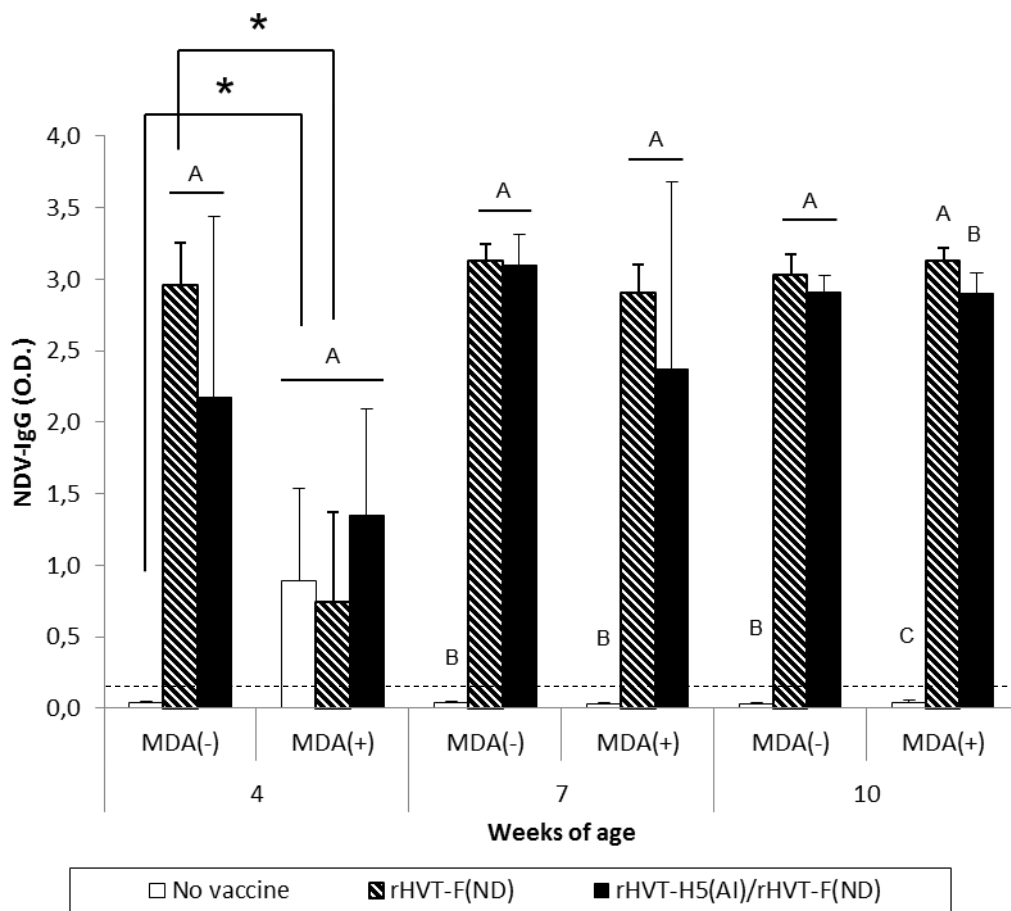

(b)

**Figure S1.** NDV-specific IgG antibody responses measured in *in-house* ELISAs-IgG for WL SPF chickens (a) and LBL layer chickens (b) vaccinated at day-old (experiments I and II, respectively) with rHVT-F(ND) or both rHVT-H5(AI)/rHVT-F(ND) vaccines. Data represent mean  $\pm$  standard deviation

9  
10

11  
12

13  
14  
15

16 of absorbance values by ELISA at specified ages ( $n = 5$ ). Serum samples were diluted 1:400. Optical  
17 density (O.D.) values  $\geq 0.100$  were considered positive (this threshold of positivity is indicated by the  
18 dotted line and was set at [average + 2  $\times$  standard deviation of sera from SPF chickens]. In figure **a**,  
19 mean  $\pm$  standard deviation at time points with no common uppercase letters indicates a significant  
20 difference between vaccination schedules ( $P < 0.05$ ). In figure **b**, mean  $\pm$  standard deviation at time  
21 points with no common uppercase letters indicates a significant difference between vaccination  
22 schedules within the MDA group ( $P < 0.05$ ), while (\*) indicates a significant difference between MDA(-  
23 ) and MDA(+) groups within a given vaccination schedule ( $P < 0.05$ ).

24

25

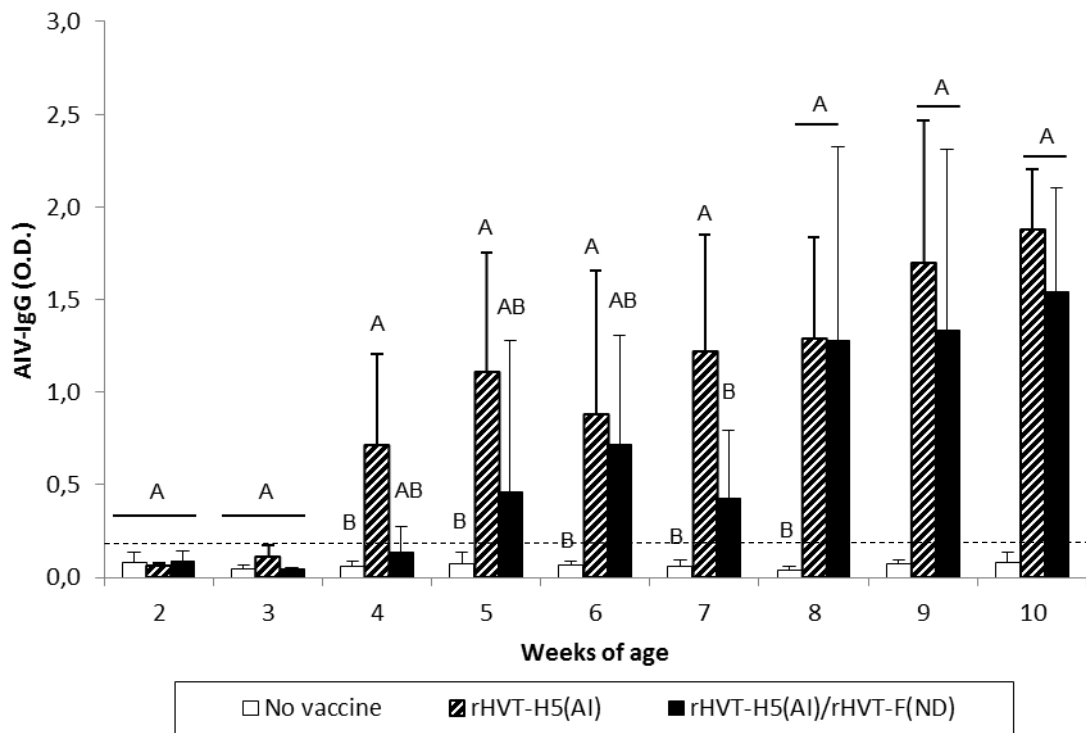

26

27

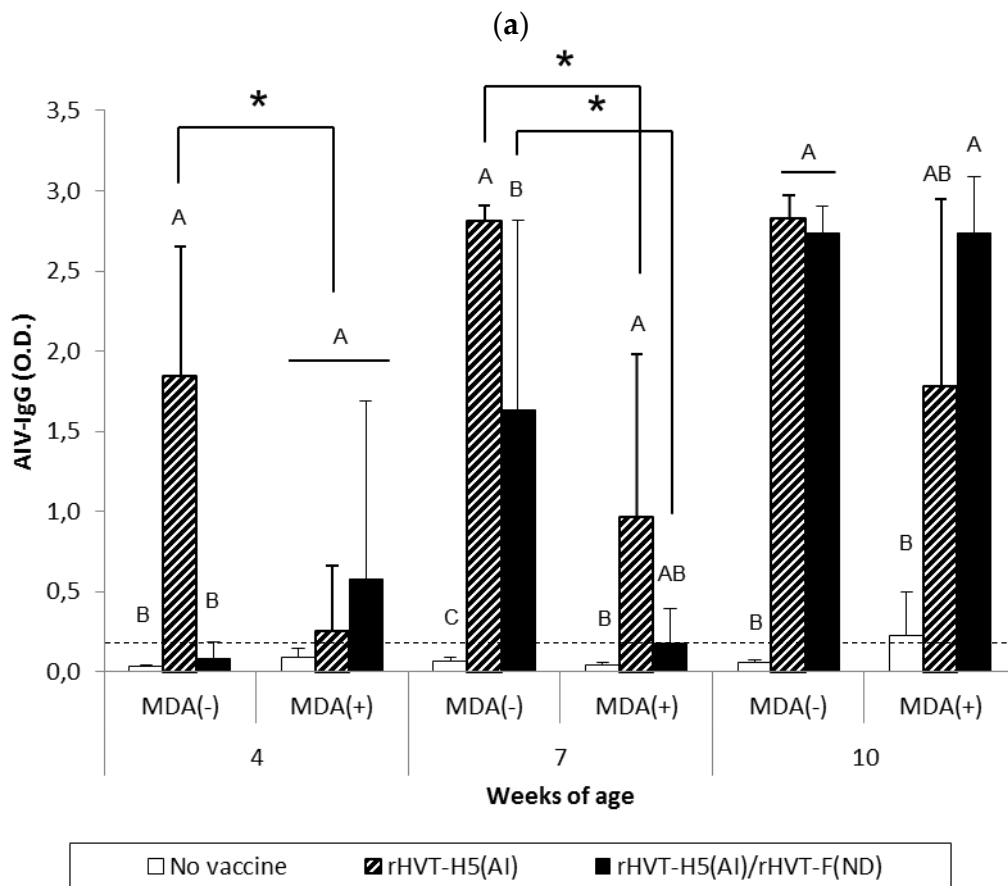

28

29

(b)

30

31

32

**Figure S2.** AIV-specific IgG antibody responses measured in *in-house* ELISAs-IgG for WL SPF chickens (a) and LBL layer chickens (b) vaccinated at day-old (experiments I and II, respectively) with rHVT-H5(AI) or both rHVT-H5(AI)/rHVT-F(ND) vaccines. Data represent mean  $\pm$  standard deviation

33 of absorbance values by ELISA at specified ages ( $n = 5$ ). Serum samples were diluted 1:100 or 1:200  
34 (experiment I and II, respectively). Optical density (O.D.) values  $\geq 0.100$  were considered positive (this  
35 threshold of positivity is indicated by the dotted line and was set at [average + 2  $\times$  standard deviation  
36 of sera from SPF chickens]. In figure **a**, mean  $\pm$  standard deviation at time points with no common  
37 uppercase letters indicates a significant difference between vaccination schedules ( $P < 0.05$ ). In figure  
38 **b**, mean  $\pm$  standard deviation at time points with no common uppercase letters indicates a significant  
39 difference between vaccination schedules within the MDA group ( $P < 0.05$ ), while (\*) indicates a  
40 significant difference between MDA(-) and MDA(+) groups within a given vaccination schedule ( $P <$   
41  $0.05$ ).

42

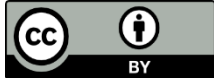

© 2020 by the authors. Submitted for possible open access publication under the terms  
and conditions of the Creative Commons Attribution (CC BY) license  
(<http://creativecommons.org/licenses/by/4.0/>).

43
